# Supplementary material
Source: HighWire-hosted journal article supplement (https://cmaj.ca/highwire/filestream/58661/field_highwire_adjunct_files/0/five-pneumonia.pdf)
Supplement: five-pneumonia.pdf [file five-pneumonia.pdf]

**Appendix 1:** References for the article “Five things to know about management of community-acquired pneumonia in the emergency department”

**References**

1. Ewig S, Torres A. Community-acquired pneumonia as an emergency: time for an aggressive intervention to lower mortality. *Eur Respir J* 2011;38:253-60.
2. Yu KT, Wyer PC. Evidence behind the 4-hour rule for initiation of antibiotic therapy for community-acquired pneumonia. *Ann Emerg Med* 2008;51:651-62.
3. Mandell LA, Wunderink RG, Anzueto A, et al. Infectious Diseases Society of America/American Thoracic Society consensus guidelines on the management of community-acquired pneumonia in adults. *Clin Infect Dis* 2007;44(Suppl 2):S27-72.
4. Chalmers JD, Taylor JK, Mandal P, et al. Validation of the Infectious Disease Society of America/American Thoracic Society minor criteria for intensive care unit admission in community-acquired pneumonia patients without major criteria or contraindications to intensive care unit care. *Clin Infect Dis* 2011;53:503-11.
5. Majumdar SR, Eurich DT, Gamble JM, et al. Oxygen saturations less than 92% are associated with major adverse events in outpatients with pneumonia: a population-based cohort study. *Clin Infect Dis* 2011;52:325-31.
6. Vanderkooi OG, Low DE, Green K, et al. Predicting antimicrobial resistance in invasive pneumococcal infections. *Clin Infect Dis* 2005;40:1288-97.
